# Supplementary figures and images for: Templated synthesis of microparticles with carbonaceous skeletal structures using polymer cubosomes as templates
Source: Royal Society of Chemistry journal article supplement (doi:10.1039/d2ra00832g), 2022-01-01

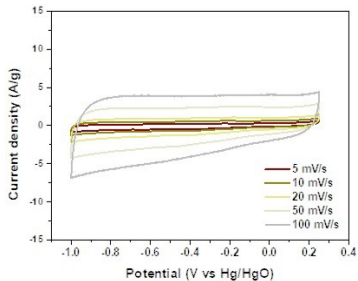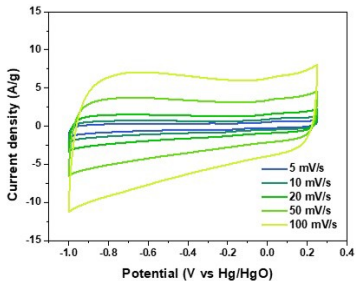

Supplement: d2ra00832g10.pdf [file d2ra00832g10.pdf]

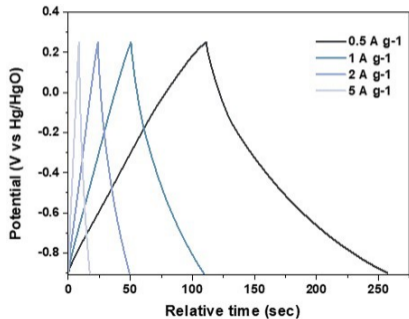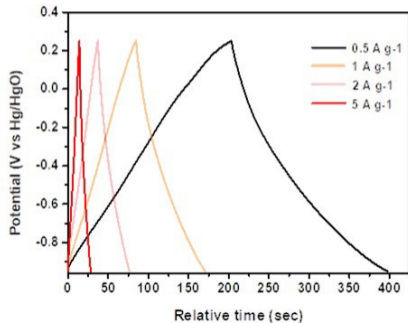

Supplement: d2ra00832g11.pdf [file d2ra00832g11.pdf]

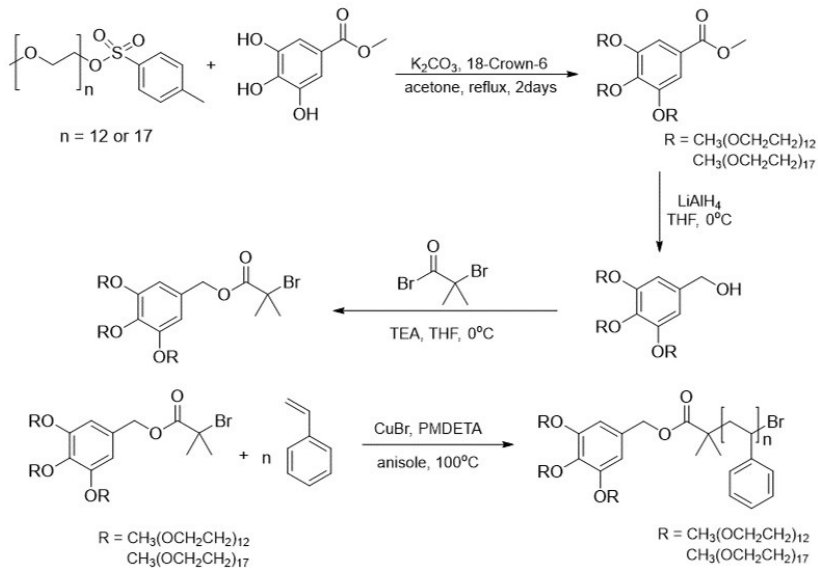

Supplement: d2ra00832g3.pdf [file d2ra00832g3.pdf]

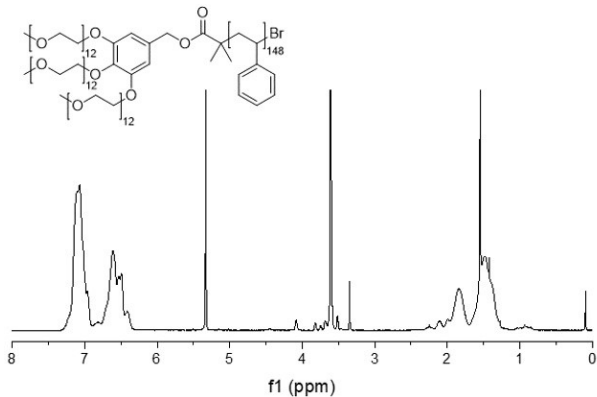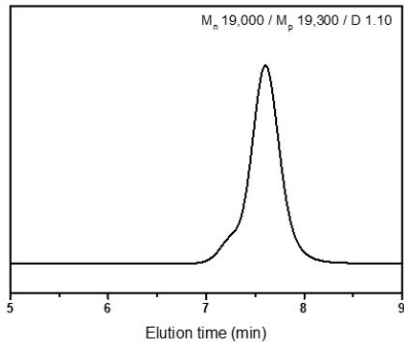

Supplement: d2ra00832g4.pdf [file d2ra00832g4.pdf]

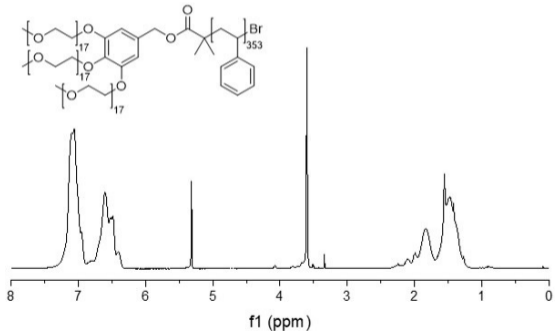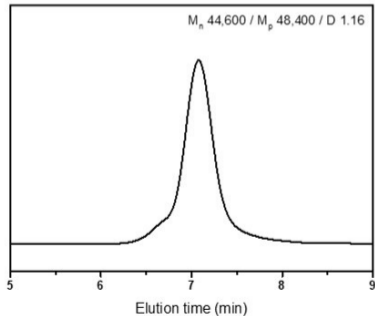

Supplement: d2ra00832g5.pdf [file d2ra00832g5.pdf]

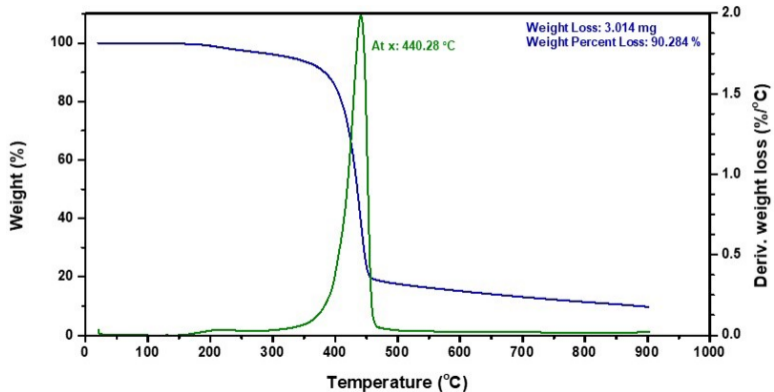

Supplement: d2ra00832g6.pdf [file d2ra00832g6.pdf]

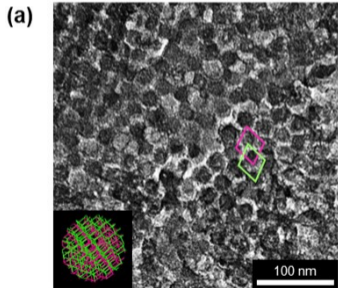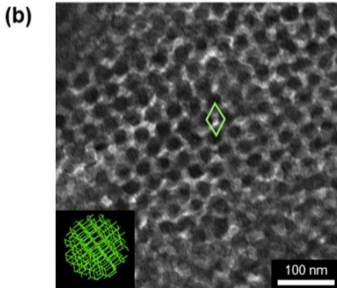

Supplement: d2ra00832g7.pdf [file d2ra00832g7.pdf]

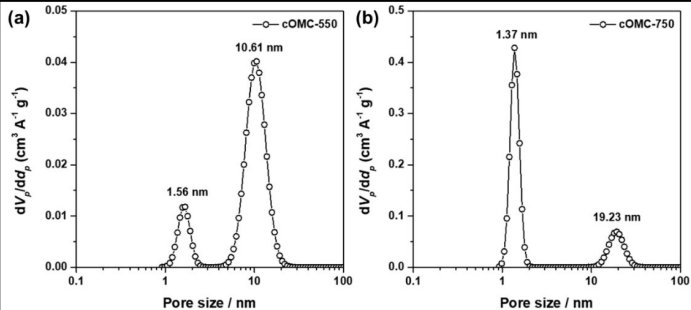

Supplement: d2ra00832g8.pdf [file d2ra00832g8.pdf]

(a)

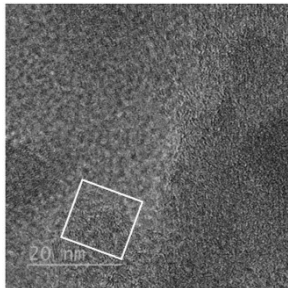

(b)

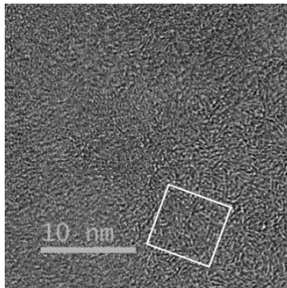

Supplement: d2ra00832g9.pdf [file d2ra00832g9.pdf]
